# Supplementary material for: Variations in the Mood States during the Different Phases of COVID-19’s Lockdown in Young Athletes
Source: MDPI journal article supplement (doi:10.3390/ijerph18179326), 2021-09-03
Supplement: s1 [file s1]

**Table S1.** Summary of the mood state scores of both sex at the different time points.

| Outcome         |        | Week 1         | Week 6         | Week 10        |
|-----------------|--------|----------------|----------------|----------------|
| TMD (AU)        |        |                |                |                |
|                 | Male   | 124.71 ± 34.37 | 120.07 ± 27.91 | 114.69 ± 28.85 |
|                 | Female | 129.17 ± 24.37 | 124.23 ± 29.41 | 119.07 ± 29.89 |
| Tension (AU)    |        |                |                |                |
|                 | Male   | 9.29 ± 5.38    | 8.50 ± 5.61    | 8.77 ± 5.48    |
|                 | Female | 10.57 ± 5.96   | 9.03 ± 5.62    | 7.74 ± 5.97    |
| Depression (AU) |        |                |                |                |
|                 | Male   | 9.57 ± 11.32   | 6.79 ± 7.49    | 4.85 ± 8.08    |
|                 | Female | 8.90 ± 7.07    | 7.37 ± 7.88    | 6.30 ± 7.66    |
| Anger (AU)      |        |                |                |                |
|                 | Male   | 9.71 ± 8.16    | 7.93 ± 6.94    | 6.69 ± 7.16    |
|                 | Female | 9.87 ± 7.51    | 9.83 ± 8.45    | 8.78 ± 8.09    |
| Vigor (AU)      |        |                |                |                |
|                 | Male   | 15.57 ± 6.28   | 14.50 ± 6.06   | 15.23 ± 5.72   |
|                 | Female | 14.37 ± 5.01   | 14.23 ± 4.70   | 14.89 ± 3.85   |
| Fatigue (AU)    |        |                |                |                |
|                 | Male   | 4.57 ± 4.05    | 4.36 ± 3.67    | 3.69 ± 3.47    |
|                 | Female | 5.83 ± 4.32    | 5.57 ± 4.35    | 5.04 ± 4.97    |
| Confusion (AU)  |        |                |                |                |
|                 | Male   | 7.14 ± 4.90    | 7.00 ± 5.13    | 5.92 ± 5.41    |
|                 | Female | 8.37 ± 4.57    | 7.47 ± 4.44    | 6.11 ± 4.90    |

Data are presented as mean ± SD. TMD: Total Mood Disturbance. AU: Arbitrary units.

**Table S2.** Summary of the mood state scores of the 3 sports at the different time points.

| Outcome         |           | Week 1                      | Week 6                      | Week 10                     |
|-----------------|-----------|-----------------------------|-----------------------------|-----------------------------|
| TMD (AU)        | Athletics | 119.28 ± 24.18              | 112.39 ± 28.34              | 106.22 ± 23.09              |
|                 | Handball  | 136.94 ± 26.62 <sup>#</sup> | 139.81 ± 32.33 <sup>#</sup> | 135.54 ± 33.26 <sup>#</sup> |
|                 | Swimming  | 128.30 ± 32.44              | 115.64 ± 19.38              | 114.67 ± 23.60              |
| Tension (AU)    | Athletics | 10.11 ± 6.44                | 8.06 ± 4.52                 | 6.89 ± 4.97                 |
|                 | Handball  | 11.38 ± 5.51                | 11.80 ± 6.49                | 10.08 ± 7.03                |
|                 | Swimming  | 8.30 ± 4.76                 | 6.18 ± 4.12 <sup>^</sup>    | 7.56 ± 5.05                 |
| Depression (AU) | Athletics | 7.17 ± 7.14                 | 4.50 ± 6.78                 | 2.83 ± 6.46                 |
|                 | Handball  | 10.56 ± 8.16                | 11.60 ± 8.76                | 10.85 ± 8.51 <sup>#</sup>   |
|                 | Swimming  | 10.30 ± 11.26               | 5.55 ± 4.74                 | 4.56 ± 5.55                 |
| Anger (AU)      | Athletics | 8.00 ± 6.32                 | 6.50 ± 5.71                 | 5.22 ± 5.33                 |
|                 | Handball  | 12.00 ± 8.15                | 14.53 ± 9.32 <sup>#</sup>   | 12.69 ± 9.99                |
|                 | Swimming  | 9.60 ± 8.73                 | 6.45 ± 5.66 <sup>^</sup>    | 7.22 ± 5.52                 |
| Vigor (AU)      | Athletics | 16.11 ± 5.44                | 15.94 ± 5.21                | 16.17 ± 4.97                |
|                 | Handball  | 13.81 ± 5.15                | 12.87 ± 5.08                | 13.39 ± 3.53                |
|                 | Swimming  | 13.80 ± 5.75                | 13.64 ± 4.59                | 15.00 ± 4.33                |
| Fatigue (AU)    | Athletics | 3.83 ± 3.24                 | 3.94 ± 3.13                 | 3.00 ± 2.61                 |
|                 | Handball  | 6.56 ± 4.63                 | 7.20 ± 4.75                 | 6.31 ± 5.60                 |
|                 | Swimming  | 6.50 ± 4.60                 | 4.46 ± 4.01                 | 5.33 ± 5.27                 |
| Confusion (AU)  | Athletics | 6.28 ± 3.75                 | 5.33 ± 4.45                 | 4.44 ± 4.38                 |
|                 | Handball  | 10.25 ± 5.03                | 10.20 ± 4.25 <sup>#</sup>   | 9.00 ± 5.34 <sup>#</sup>    |
|                 | Swimming  | 7.40 ± 4.40                 | 6.64 ± 3.56                 | 5.00 ± 4.15                 |

Data are presented as mean ± SD. TMD: Total Mood Disturbance. AU: Arbitrary units. <sup>#</sup> $p_{\text{Bonferroni}} \leq 0.05$  different to Athletics values. <sup>^</sup> $p_{\text{Bonferroni}} \leq 0.05$  different to Handball values.
